# Supplementary material for: Simulating the variations of carbon dioxide in the global atmosphere on the hexagonal grid of DYNAMICO coupled with the LMDZ6 model
Source: Copernicus journal article supplement (doi:10.5194/gmd-2023-140), 2023-11-02
Supplement: Supplementary file 1 [file gmd-2023-140-supplement.pdf]

# Supplement

**Table S1: List of datasets used from Obspack for surface stations**

| Site code | Dataset                              |
|-----------|--------------------------------------|
| ABT       | abt_surface-insitu_6_allvalid        |
| ALT       | alt_surface-flask_1_representative   |
| ALT       | alt_surface-flask_426_representative |
| ALT       | alt_surface-flask_2_representative   |
| ALT       | alt_surface-insitu_6_allvalid        |
| ALT       | alt_surface-flask_4_representative   |
| AME       | ame_surface-insitu_60_allhours       |
| AMS       | ams_surface-insitu_11_allvalid       |
| AMS       | ams_surface-flask_1_representative   |
| AMT       | amt_tower-insitu_1_allvalid-30magl   |
| AMT       | amt_surface-pfp_1_allvalid-107magl   |
| AMT       | amt_tower-insitu_1_allvalid-107magl  |
| AMT       | amt_tower-insitu_1_allvalid-12magl   |
| AZV       | azv_tower-insitu_20_allvalid-29magl  |
| AZV       | azv_tower-insitu_20_allvalid-50magl  |
| BAO       | bao_tower-insitu_1_allvalid-22magl   |
| BAO       | bao_tower-insitu_1_allvalid-100magl  |
| BAO       | bao_surface-pfp_1_allvalid-300magl   |
| BAO       | bao_tower-insitu_1_allvalid-300magl  |
| BCK       | bck_surface-insitu_6_allvalid        |
| BRA       | bra_surface-insitu_6_allvalid        |
| BRM       | brm_tower-insitu_49_allvalid-72magl  |
| BRM       | brm_tower-insitu_49_allvalid-12magl  |
| BRM       | brm_tower-insitu_49_allvalid-45magl  |
| BRM       | brm_tower-insitu_49_allvalid-212magl |

|     |                                         |
|-----|-----------------------------------------|
| BRM | brm_tower-insitu_49_allvalid-132magl    |
| BRW | brw_surface-flask_1_representative      |
| BRW | brw_surface-flask_4_representative      |
| BRW | brw_surface-flask_426_representative    |
| BRW | brw_surface-insitu_1_allvalid           |
| BRZ | brz_tower-insitu_20_allvalid-20magl     |
| BRZ | brz_tower-insitu_20_allvalid-80magl     |
| BRZ | brz_tower-insitu_20_allvalid-5magl      |
| BRZ | brz_tower-insitu_20_allvalid-40magl     |
| BU  | bu_surface-insitu_59_allhours           |
| CBW | cbw_tower-insitu_445_allvalid-27magl    |
| CBW | cbw_tower-insitu_445_allvalid-127magl   |
| CBW | cbw_tower-insitu_445_allvalid-67magl    |
| CBW | cbw_tower-insitu_445_allvalid-207magl   |
| CBY | cby_surface-insitu_6_allvalid           |
| CHL | chl_surface-insitu_6_allvalid           |
| CIT | cit_surface-insitu_115_allhours-200magl |
| COP | cop_tower-insitu_59_allhours            |
| CPS | cps_surface-insitu_6_allvalid           |
| CPT | cpt_surface-insitu_36_marine            |
| CPT | cpt_surface-flask_1_representative      |
| CRV | crv_surface-pfp_1_allvalid-32magl       |
| CRV | crv_tower-insitu_1_allvalid-5magl       |
| CRV | crv_tower-insitu_1_allvalid-32magl      |
| CRV | crv_tower-insitu_1_allvalid-17magl      |
| DEC | dec_surface-insitu_431_allvalid         |
| DEM | dem_tower-insitu_20_allvalid-45magl     |
| DEM | dem_tower-insitu_20_allvalid-63magl     |
| EGB | egb_surface-insitu_6_allvalid           |

|       |                                       |
|-------|---------------------------------------|
| ENA   | ena_surface-insitu_64_allvalid-10magl |
| ESP   | esp_surface-insitu_6_allvalid         |
| ESP   | esp_surface-flask_2_representative    |
| ETL   | etl_surface-insitu_6_allvalid         |
| FNE   | fne_surface-insitu_6_allvalid         |
| FSD   | fsd_surface-insitu_6_allvalid         |
| GCI05 | gci05_tower-insitu_60_allvalid        |
| GIC   | gic_surface-insitu_431_allvalid       |
| GIF   | gif_surface-insitu_11_allvalid        |
| GOULD | gould_shipboard-insitu_1_allvalid     |
| HDP   | hdp_surface-insitu_3_nonlocal         |
| HEI   | hei_surface-insitu_22_allvalid        |
| HNP   | hnp_surface-insitu_6_allvalid         |
| HUN   | hun_tower-insitu_35_allvalid-115magl  |
| HUN   | hun_tower-insitu_35_allvalid-10magl   |
| HUN   | hun_tower-insitu_35_allvalid-48magl   |
| HUN   | hun_tower-insitu_35_allvalid-82magl   |
| HUN   | hun_surface-flask_1_representative    |
| IGR   | igr_tower-insitu_20_allvalid-47magl   |
| IGR   | igr_tower-insitu_20_allvalid-24magl   |
| INU   | inu_surface-insitu_6_allvalid         |
| INX01 | inx01_surface-insitu_60_allhours      |
| INX02 | inx02_surface-insitu_60_allhours      |
| INX03 | inx03_surface-insitu_60_allhours      |
| INX04 | inx04_surface-insitu_60_allhours      |
| INX06 | inx06_surface-insitu_60_allhours      |
| INX07 | inx07_surface-insitu_60_allhours      |
| INX09 | inx09_surface-insitu_60_allhours      |
| INX10 | inx10_surface-insitu_60_allhours      |

|       |                                        |
|-------|----------------------------------------|
| INX13 | inx13_surface-insitu_60_allhours       |
| JFJ   | jfj_surface-insitu_5_allvalid          |
| JFJ   | jfj_surface-insitu_49_allvalid         |
| KAS   | kas_surface-insitu_53_allvalid         |
| KCMP  | kcmp_tower-insitu_102_allhours-200magl |
| KRS   | krs_tower-insitu_20_allvalid-35magl    |
| KRS   | krs_tower-insitu_20_allvalid-67magl    |
| KUM   | kum_surface-flask_426_representative   |
| KUM   | kum_surface-flask_4_representative     |
| KUM   | kum_surface-flask_1_representative     |
| LAN   | lan_surface-insitu_33_allvalid         |
| LEF   | lef_surface-pfp_1_allvalid-244magl     |
| LEF   | lef_tower-insitu_1_allvalid-396magl    |
| LEF   | lef_surface-pfp_1_allvalid-396magl     |
| LEF   | lef_tower-insitu_1_allvalid-11magl     |
| LEF   | lef_tower-insitu_1_allvalid-122magl    |
| LEF   | lef_tower-insitu_1_allvalid-76magl     |
| LEF   | lef_tower-insitu_1_allvalid-244magl    |
| LEF   | lef_tower-insitu_1_allvalid-30magl     |
| LFS   | lfs_surface-insitu_33_allvalid         |
| LLB   | llb_surface-flask_1_representative     |
| LLB   | llb_surface-insitu_6_allvalid          |
| MBO   | mbo_surface-pfp_1_allvalid-11magl      |
| MBO   | mbo_surface-insitu_1_allvalid-11magl   |
| MHD   | mhd_surface-insitu_11_representative   |
| MHD   | mhd_surface-flask_1_representative     |
| MLO   | mlo_surface-insitu_1_allvalid          |
| MLO   | mlo_surface-flask_4_representative     |
| MLO   | mlo_surface-flask_426_representative   |

|     |                                       |
|-----|---------------------------------------|
| MLO | mlo_surface-flask_2_representative    |
| MLO | mlo_surface-flask_1_representative    |
| MNM | mmn_surface-insitu_19_representative  |
| MRC | mrc_surface-pfp_1_allvalid-east       |
| MRC | mrc_tower-insitu_60_allvalid-south    |
| MRC | mrc_surface-pfp_1_allvalid-south      |
| NOR | nor_tower-insitu_424_allvalid-100magl |
| NOR | nor_tower-insitu_424_allvalid-59magl  |
| NOR | nor_tower-insitu_424_allvalid-32magl  |
| NOY | noy_tower-insitu_20_allvalid-43magl   |
| NOY | noy_tower-insitu_20_allvalid-21magl   |
| NWR | nwr_surface-pfp_1_allvalid-3magl      |
| NWR | nwr_surface-flask_1_representative    |
| NWR | nwr_surface-insitu_3_nonlocal         |
| OFR | ofr_surface-insitu_68_allhours        |
| OLI | oli_surface-insitu_64_allvalid-10magl |
| OMP | omp_surface-insitu_68_allhours        |
| OMT | omt_surface-insitu_68_allhours        |
| ONG | ong_surface-insitu_68_allhours        |
| OPE | ope_tower-insitu_11_allvalid-120magl  |
| OSI | osi_tower-insitu_68_allhours-269magl  |
| OSI | osi_tower-insitu_68_allhours-31magl   |
| OWA | owa_surface-insitu_68_allhours        |
| OYQ | oyq_surface-insitu_68_allhours        |
| PAL | pal_surface-insitu_30_marine          |
| PAL | pal_surface-flask_1_representative    |
| PAL | pal_surface-insitu_30_continental     |
| PAL | pal_surface-insitu_30_nonlocal        |
| PDM | pdm_surface-flask_11_representative   |

|     |                                       |
|-----|---------------------------------------|
| PDM | pdm_surface-insitu_11_allvalid        |
| POC | poc_shipboard-flask_1_representative  |
| PRS | prs_surface-insitu_21_allvalid        |
| PUY | puy_surface-insitu_11_allvalid        |
| RGL | rgl_tower-insitu_160_allvalid-90magl  |
| RGL | rgl_tower-insitu_160_allvalid-45magl  |
| RYO | ryo_surface-insitu_19_representative  |
| SCT | sct_tower-insitu_1_allvalid-61magl    |
| SCT | sct_surface-pfp_1_allvalid-305magl    |
| SCT | sct_tower-insitu_1_allvalid-31magl    |
| SCT | sct_tower-insitu_1_allvalid-305magl   |
| SGP | sgp_surface-flask_1_representative    |
| SGP | sgp_surface-insitu_64_allvalid-60magl |
| SMO | smo_surface-insitu_1_allvalid         |
| SMO | smo_surface-flask_1_representative    |
| SMO | smo_surface-flask_426_representative  |
| SMO | smo_surface-flask_4_representative    |
| SMR | smr_tower-insitu_421_allvalid-67magl  |
| SMR | smr_tower-insitu_421_allvalid-17magl  |
| SMR | smr_tower-insitu_421_allvalid-125magl |
| SNP | snp_surface-insitu_1_allvalid-5magl   |
| SNP | snp_surface-insitu_1_allvalid-10magl  |
| SNP | snp_surface-insitu_1_allvalid-17magl  |
| SPL | spl_surface-insitu_3_nonlocal         |
| SPO | spo_surface-flask_426_representative  |
| SPO | spo_surface-insitu_1_allvalid         |
| SPO | spo_surface-flask_1_representative    |
| SPO | spo_surface-flask_4_representative    |
| SPO | spo_surface-flask_2_representative    |

|       |                                       |
|-------|---------------------------------------|
| SSL   | ssl_surface-insitu_107_allvalid       |
| STR   | str_surface-pfp_1_allvalid-232magl    |
| SYO   | syo_surface-flask_1_representative    |
| SYO   | syo_surface-insitu_8_allvalid         |
| TAC   | tac_tower-insitu_160_allvalid-54magl  |
| TAC   | tac_surface-flask_1_representative    |
| TAC   | tac_tower-insitu_160_allvalid-100magl |
| TAC   | tac_tower-insitu_160_allvalid-185magl |
| TIK   | tik_surface-insitu_30_allvalid        |
| TIK   | tik_surface-flask_1_representative    |
| TPD   | tpd_surface-insitu_6_allvalid         |
| TRN   | trn_tower-insitu_11_allvalid-180magl  |
| UTDBK | utdbk_tower-insitu_432_allvalid       |
| UTMUR | utmur_tower-insitu_432_allvalid       |
| UTRPK | utrpk_tower-insitu_432_allvalid       |
| UTSUG | utsug_tower-insitu_432_allvalid       |
| UTUOU | utuou_tower-insitu_432_allvalid       |
| WAO   | wao_surface-insitu_13_allvalid        |
| WBI   | wbi_tower-insitu_1_allvalid-99magl    |
| WBI   | wbi_tower-insitu_1_allvalid-379magl   |
| WBI   | wbi_tower-insitu_1_allvalid-31magl    |
| WBI   | wbi_surface-pfp_1_allvalid-379magl    |
| WGC   | wgc_surface-pfp_1_allvalid-91magl     |
| WGC   | wgc_tower-insitu_1_allvalid-91magl    |
| WGC   | wgc_tower-insitu_1_allvalid-30magl    |
| WGC   | wgc_surface-pfp_1_allvalid-483magl    |
| WGC   | wgc_tower-insitu_1_allvalid-483magl   |
| WKT   | wkt_tower-insitu_1_allvalid-457magl   |
| WKT   | wkt_tower-insitu_1_allvalid-62magl    |

WKT wkt\_tower-insitu\_1\_allvalid-30magl  
WKT wkt\_tower-insitu\_1\_allvalid-9magl  
WKT wkt\_surface-pfp\_1\_allvalid-457magl  
WKT wkt\_tower-insitu\_1\_allvalid-122magl  
WKT wkt\_surface-pfp\_1\_allvalid-122magl  
WKT wkt\_tower-insitu\_1\_allvalid-244magl  
WSA wsa\_surface-insitu\_6\_allvalid  
YAK yak\_tower-insitu\_20\_allvalid-77magl  
YAK yak\_tower-insitu\_20\_allvalid-11magl  
YON yon\_surface-insitu\_19\_representative

**Table S2: List of aircraft datasets used from Obspack and their respective aircraft campaign**

| Campaign code | Dataset                                 |
|---------------|-----------------------------------------|
| AAO           | aao_aircraft-pfp_1_allvalid             |
| ACG           | acg_aircraft-insitu_1_allvalid          |
| ACG           | acg_aircraft-pfp_1_allvalid             |
| ACT           | act_aircraft-pfp_1_allvalid-c130        |
| ACT           | act_aircraft-pfp_1_allvalid-b200        |
| ACT           | act_aircraft-insitu_428_allvalid-b200   |
| ACT           | act_aircraft-insitu_428_allvalid-c130   |
| AOA           | aoa_aircraft-flask_19_allvalid          |
| ARCPAC2008    | arcpac2008_aircraft-insitu_114_allvalid |
| BRZ           | brz_aircraft-insitu_20_allvalid         |
| CALNEX2010    | calnex2010_aircraft-insitu_114_allvalid |
| CAR           | car_aircraft-pfp_1_allvalid             |
| CMA           | cma_aircraft-pfp_1_allvalid             |
| COB           | cob_aircraft-pfp_1_allvalid             |
| COB           | cob2004_aircraft-insitu_59_allvalid     |
| COB           | cob2003b_aircraft-insitu_59_allvalid    |
| COB           | cob_aircraft-flask_1_allvalid           |



|       |                                                  |
|-------|--------------------------------------------------|
| COB   | cob_aircraft-insitu_59_allvalid                  |
| CRV   | above_aircraft-pfp_1_allvalid                    |
| CRV   | crv_aircraft-pfp_1_allvalid                      |
| CRV   | above_aircraft-insitu_1_allvalid                 |
| DND   | dnd_aircraft-pfp_1_allvalid                      |
| ECO   | eco_aircraft-insitu_1_allvalid                   |
| ESP   | esp_aircraft-pfp_1_allvalid                      |
| ETL   | etl_aircraft-pfp_1_allvalid                      |
| GSFC  | gsfc_aircraft-insitu_430_allvalid                |
| HIL   | hil_aircraft-pfp_1_allvalid                      |
| HIP   | hip_aircraft-insitu_59_allvalid                  |
| HUAC  | start08_aircraft-insitu_59_allvalid              |
| IAGOS | iagos-caribic_aircraft-insitu_457_allvalid       |
| IAGOS | iagos-caribic_aircraft-flask_457_allvalid        |
| LARC  | trace-p_aircraft-insitu_428_allvalid-p3b         |
| LARC  | dc3_aircraft-insitu_428_allvalid-dc8             |
| LARC  | seac4rs_aircraft-insitu_428_allvalid-ER2         |
| LARC  | arctas_aircraft-insitu_428_allvalid-dc8          |
| LARC  | intex-b_aircraft-insitu_428_allvalid-dc8         |
| LARC  | discover-aq_aircraft-insitu_428_allvalid-p3b-ca  |
| LARC  | discover-aq_aircraft-insitu_428_allvalid-p3b-co  |
| LARC  | dc3_aircraft-insitu_428_allvalid-falcon          |
| LARC  | korus-aq_aircraft-insitu_428_allvalid-dc8        |
| LARC  | trace-p_aircraft-insitu_428_allvalid-dc8         |
| LARC  | discover-aq_aircraft-insitu_428_allvalid-c130-co |
| LARC  | seac4rs_aircraft-insitu_428_allvalid-dc8         |
| LARC  | discover-aq_aircraft-insitu_428_allvalid-p3b-tx  |
| LARC  | intex-na_aircraft-insitu_428_allvalid-dc8        |
| NHA   | nha_aircraft-pfp_1_allvalid                      |

|             |                                          |
|-------------|------------------------------------------|
| ORC         | orc_aircraft-insitu_3_allvalid-merge10   |
| PFA         | pfa_aircraft-pfp_1_allvalid              |
| RTA         | rta_aircraft-pfp_1_allvalid              |
| SAN         | san_aircraft-pfp_1_allvalid              |
| SAN         | san_aircraft-pfp_26_representative       |
| SCA         | sca_aircraft-pfp_1_allvalid              |
| SGP         | sgp_aircraft-pfp_1_allvalid              |
| SONGNEX2015 | songnex2015_aircraft-insitu_114_allvalid |
| TEXAQS2006  | texaqs2006_aircraft-insitu_114_allvalid  |
| TGC         | tgc_aircraft-pfp_1_allvalid              |
| THD         | thd_aircraft-pfp_1_allvalid              |
| TOM         | tom_aircraft-insitu_1_allvalid           |
